# Supplementary material
Source: Springer Nature journal article supplement (https://www.springermedizin.de/resource/supplementary/12936_2014_3664_MOESM6_ESM.pdf/9546136)

Gametocytes /mL

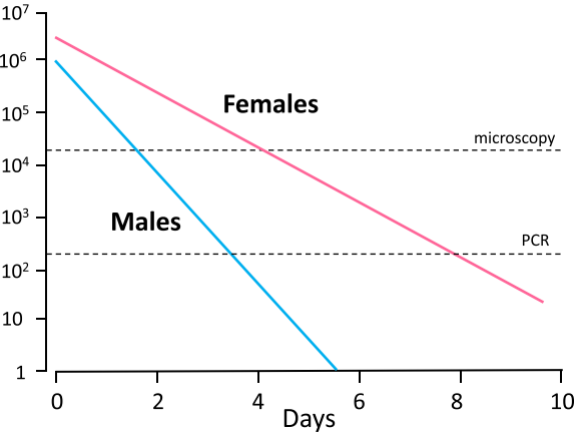

Supplement: MOESM6 [file 9546136]
